# Supplementary material for: Acute Effects of Neuromuscular Electrical Stimulation on Contralateral Plantar Flexor Neuromuscular Function
Source: MDPI journal article supplement (doi:10.3390/biology11111655), 2022-11-12
Supplement: s1 [file s1]

**Supplementary Table S1. Ipsilateral torque recorded for each condition when electrical stimulation delivered to the contralateral tibial nerve**

|                      |    | Condition                       |                                  |                                 |                                  |
|----------------------|----|---------------------------------|----------------------------------|---------------------------------|----------------------------------|
|                      |    | REST                            | VOL                              | CONV                            | WPHF                             |
|                      | N  |                                 |                                  |                                 |                                  |
| H <sub>max</sub>     | 10 | 0 (0 to 0) <sup>a</sup>         | 10.4 (9.8 to 10.6) <sup>b</sup>  | 5.4 (4 to 6.7) <sup>c</sup>     | 7.1 (6 to 14.7) <sup>b</sup>     |
| M <sub>max</sub>     | 10 | 0 (0 to 0) <sup>a</sup>         | 10.3 (9.9 to 11.3) <sup>b</sup>  | 9.1 (7.1 to 12.9) <sup>b</sup>  | 15.0 (10.5 to 28.7) <sup>c</sup> |
| Superimposed doublet | 22 | 8.1 (-0.4 to 18.4) <sup>a</sup> | 10.5 (10 to 11.5) <sup>a</sup>   | 15.5 (7.7 to 19.8) <sup>a</sup> | 15.4 (11.2 to 30.8) <sup>b</sup> |
| M <sub>sup</sub>     | 10 | 20.2 (9.8 to 33.3) <sup>a</sup> | 10.9 (10.3 to 11.8) <sup>a</sup> | 11 (6.4 to 31.1) <sup>a</sup>   | 26.1 (16.8 to 65.8) <sup>b</sup> |
| Potentiated doublet  | 22 | 0.6 (0 to 2.6) <sup>a</sup>     | 10.6 (9.3 to 12.3) <sup>b</sup>  | 12.8 (9.7 to 18.4) <sup>b</sup> | 14.7 (6 to 37.9) <sup>b</sup>    |

Values are median (25<sup>th</sup> to 75<sup>th</sup> percentile) and expressed as % of ipsilateral MVC torque. Conditions that do not share a letter are significantly different from one another for that stimulation parameter ( $P < 0.05$ ). H<sub>max</sub> = stimulation to evoke a maximal H-reflex, M<sub>max</sub> = stimulation to evoke a maximal M-wave. M<sub>sup</sub> = stimulation at the intensity of M<sub>max</sub> delivered during the maximal voluntary contraction. The number of participants is denoted by N. Due to problems with EMG data acquisition two subjects had to be excluded from these analyses.
